# Supplementary material for: Active sites, kinetics, and inhibiting species in the catalytic dehydration of methanol over MIL-100(Cr)
Source: Royal Society of Chemistry journal article supplement (doi:10.1039/d2cy01877b), 2023-01-01
Supplement: d2cy01877b1.pdf [file d2cy01877b1.pdf]

## Supporting Information

### Active Sites, Kinetics, and Inhibiting Species in the Catalytic Dehydration of Methanol over MIL-100(Cr)

Mengying Li, Jiakang Chen, Jacklyn N. Hall, Praveen Bollini\*

*William A. Brookshire Department of Chemical and Biomolecular Engineering, University of  
Houston, Houston, TX, 77204, USA*

\*Corresponding author. E-mails: [ppbollini@uh.edu](mailto:ppbollini@uh.edu)

## Table of Contents

|                                                                                                    |    |
|----------------------------------------------------------------------------------------------------|----|
| <b>S.1. Characterization results</b> .....                                                         | 3  |
| <b>S.2. In-situ titration with 2,6 DTBP over MIL-100(Cr)</b> .....                                 | 4  |
| <b>S.3. Assessment of transport limitations</b> .....                                              | 5  |
| <b>S.4. Derivation of plausible methanol dehydration rate expressions</b> .....                    | 7  |
| <b>S.5. Dependence of DME formation rate on DME and water partial pressure</b> .....               | 13 |
| <b>S.6. Evolution of Brønsted acid site intensity after flowing 0.1 – 2 kPa methanol</b> .....     | 14 |
| <b>S.7. Parity Plots</b> .....                                                                     | 15 |
| <b>S.8. Dependence of DME formation rates on contact time</b> .....                                | 16 |
| <b>S.9. Evolution of methanol monomer coverage after dosing 1 <math>\mu</math>L methanol</b> ..... | 17 |

## S.1. Characterization results

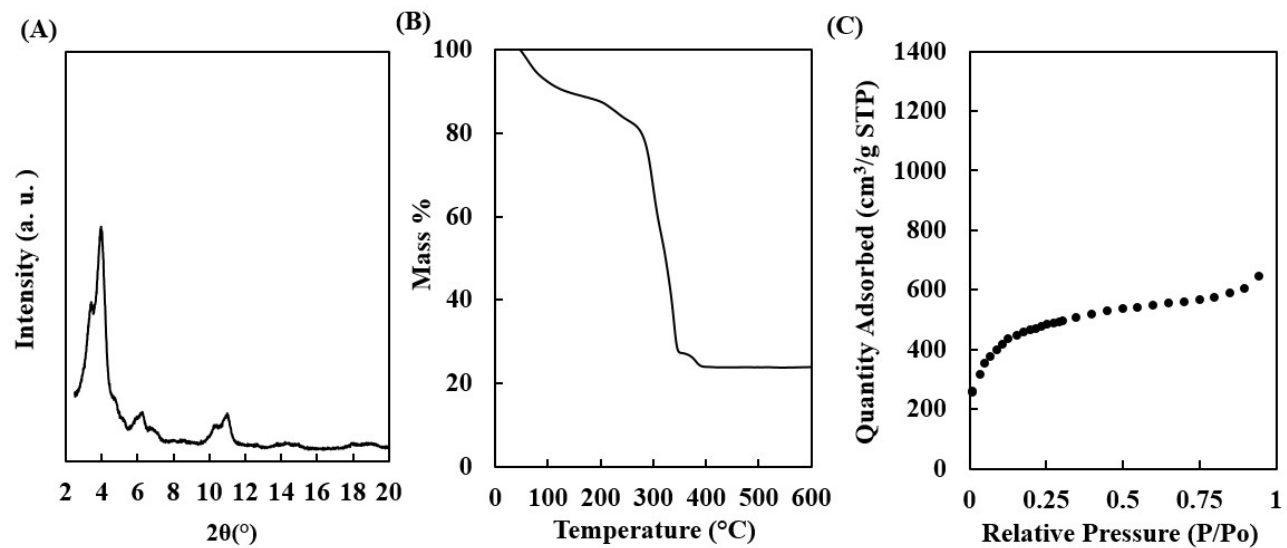

Figure S1. (A) X-ray diffraction pattern (B) TGA profile (C) N<sub>2</sub> physisorption isotherm for MIL-100(Cr)

## S.2. In-situ titration with 2,6 DTBP over MIL-100(Cr)

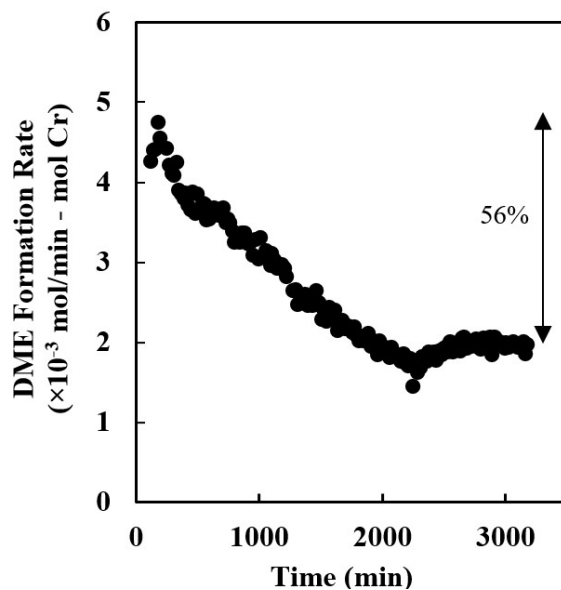

Figure S2. DME formation rate as a function of time during in-situ titration with 2,6 DTBP. Reaction conditions: 493 K, 26 Pa 2,6 DTBP, 0.4 kPa methanol,  $0.013 \text{ mol methanol (mol Cr)}^{-1} \text{ s}^{-1}$ .

### S.3. Assessment of transport limitations

Table S1. Summary of criteria used for assessing internal and external mass and heat transfer, as well as the formation of hot spots. All values are estimated at a temperature of 493 K and contact time of 5.28 s.

|                             | Criterion                 | Upper limit                                                                         | Highest value          |
|-----------------------------|---------------------------|-------------------------------------------------------------------------------------|------------------------|
| Internal mass transfer      | Weisz-Prater <sup>1</sup> | $\frac{-r'_A \rho_c R^2}{D_{eff} C_{AS}} \ll 1$                                     | 0.0018                 |
| External mass transfer      | Mears <sup>2</sup>        | $\frac{-r'_A \rho_b R n}{K_c C_{AS}} < 0.15$                                        | $1.54 \times 10^{-9}$  |
| Internal heat transfer      | Anderson <sup>3</sup>     | $\frac{ \Delta H_R   r'_A  \rho_c R^2 E_a}{k_{eff} T^2 R_g} < 0.75$                 | $1.09 \times 10^{-5}$  |
| External heat transfer      | Mears <sup>4,5</sup>      | $\frac{ \Delta H_R   r'_A  \rho_b R E_a}{h T^2 R_g} < 0.15$                         | $1.52 \times 10^{-10}$ |
| Hot spot formation          | Balakotaiah <sup>6</sup>  | $\frac{\tau_h}{\tau_g} = \frac{E_a \Delta T_{ad}}{RT_f T_f} k(T_f) \tau_h < 0.368$  | $2.84 \times 10^{-6}$  |
| Radial temperature gradient | Mears <sup>2</sup>        | $\frac{E_a \Delta T_{ad}}{RT_f T_f} \frac{k(T_f) D_t^2}{k_{eff} / C_{pv}(T_f)} < 1$ | 0.0056                 |

#### Nomenclature:

$r'_A$  : observed reaction rate  $mol/(s * g)$

$\rho_c$  : catalyst particle density,  $g/m^3$

$R$  : particle radius,  $m$

$D_{eff}$ : effective diffusion coefficient,  $m^2/s$

$C_{AS}$  : reactant concentration at the surface of the pellet  $mol/m^3$

$\rho_b$  : catalyst bulk density,  $g/m^3$

$n$  : reaction order

$K_c$  : external mass transfer coefficient

$K_c$  : external mass transfer coefficient

$\Delta H_R$  : heat of reaction  $J/mol$

$E_a$  : activation energy,  $J/mol$

$k_{eff}$  : effective catalyst thermal conductivity,  $W/(m * K)$

$T$  : catalyst surface temperature,  $K$

$R_g$  : ideal gas constant,  $J/(mol * K)$

$h$  : heat transfer coefficient,  $kW/(m^2 * K)$

$k(T_f)$  : rate constant,  $s^{-1}$

$T_f$  : furnace temperature,  $K$

$\Delta T_{ad}$  : adiabatic temperature rise,  $K$

$D_t$  : tube diameter,  $m$

$C_{pv}$  : volumetric specific heat capacity of the gas mixture,  $J/(m^3 * K)$

$\tau_g$  : characteristic heat generation times,  $s$

$\tau_h$  : characteristic heat removal times,  $s$

## S.4. Derivation of plausible methanol dehydration rate expressions

### S.4.1 Kinetically-relevant methoxy formation in the dissociative scheme

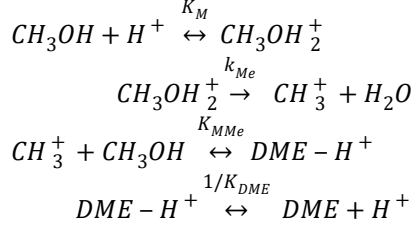

Assuming the formation of surface methoxy groups through the dehydration of methanol monomers is the rate determining step, and all the other steps are quasi-equilibrated, the rate expression can be written as:

$$\frac{r_{DME}}{[L]} = \frac{k_{Me} [CH_3OH_2^+]}{[L]} \quad (S1a)$$

where  $k_{Me}$  is the rate constant for the dehydration of methanol monomers. The total number of active sites (L) can be expressed as follows:

$$[L] = [H^+] + [CH_3OH_2^+] + [CH_3^+] + [DME - H^+] \quad (S1b)$$

The concentration of surface intermediates can be expressed as:

$$[CH_3OH_2^+] = K_M [CH_3OH] [H^+] \quad (S1c)$$

$$[DME - H^+] = K_{DME} [DME] [H^+] \quad (S1d)$$

$$[CH_3^+] = \frac{K_{DME} [DME] [H^+]}{K_{MMe} [CH_3OH]} \quad (S1e)$$

where  $K_M$ ,  $K_{MMe}$  and  $1/K_{DME}$  are equilibrium constants for the formation of methanol monomers, the formation of surface methoxies, and the desorption of DME.

Substituting Eq. S1b - e into Eq. S1a gives the resulting rate expression for DME formation:

$$\frac{r_{DME}}{[H^+]} = \frac{k_{Me} K_M [CH_3OH]}{1 + K_M [CH_3OH] + \frac{K_{DME} [DME]}{K_{MMe} [CH_3OH]} + K_{DME} [DME]} \quad (S1f)$$

*S.4.2 Kinetically-relevant methoxy formation in the dissociative scheme with water monomers and water dimers as inhibitory species*

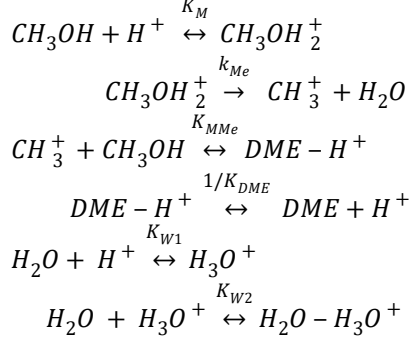

Assuming the formation of surface methoxies through the dehydration of methanol monomers is the rate determining step, and all other steps are quasi-equilibrated, the rate expression can be written as:

$$\frac{r_{DME}}{[L]} = \frac{k_{Me} [CH_3OH_2^+]}{[L]} \quad (S2a)$$

where  $k_{Me}$  is the rate constant for the dehydration of methanol monomers. The total number of active sites (L) can be expressed as following:

$$[L] = [H^+] + [CH_3OH_2^+] + [CH_3^+] + [DME - H^+] + [H_3O^+] + [H_2O - H_3O^+] \quad (S2b)$$

Concentrations of surface intermediates can be expressed as:

$$[CH_3OH_2^+] = K_M [CH_3OH] [H^+] \quad (S2c)$$

$$[DME - H^+] = K_{DME} [DME] [H^+] \quad (S2d)$$

$$[CH_3^+] = \frac{K_{DME} [DME] [H^+]}{K_{MMe} [CH_3OH]} \quad (S2e)$$

$$[H_3O^+] = K_{W1} [H_2O] [H^+] \quad (S2f)$$

$$[H_2O - H_3O^+] = K_{W1} K_{W2} [H_2O]^2 [H^+] \quad (S2g)$$

where  $K_M$ ,  $K_{MMe}$ ,  $1/K_{DME}$ ,  $K_{W1}$ , and  $K_{W2}$  are the equilibrium constants for the formation of methanol monomers, the formation of surface methoxies, the desorption of DME, and the formation of water monomers and water dimers.



Substituting Eq. S2b - g into Eq. S2a gives the resulting rate expression for DME formation:

$$\frac{r_{DME}}{[H^+]} = \frac{k_{Me}K_M[CH_3OH]}{1 + K_M[CH_3OH] + \frac{K_{DME}[DME]}{K_{MMe}[CH_3OH]} + K_{DME}[DME] + K_{W1}[H_2O] + K_{W1}K_{W2}[H_2O]^2} \quad (S2f)$$

### S.4.3 Kinetically-relevant dehydration of methanol dimers in the associative scheme

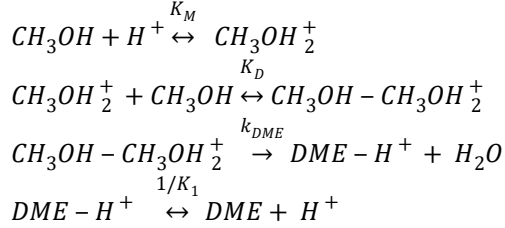

Assume the decomposition of methanol dimers is rate determining, and all other steps are quasi-equilibrated, the rate expression can be written as:

$$\frac{r_{DME}}{[L]} = \frac{k_{DME} [CH_3OH - CH_3OH_2^+]}{[L]} \quad (S3a)$$

where  $k_{DME}$  is the rate constant for decomposition of the methanol dimer. The total number of active sites (L) can be expressed as following:

$$[L] = [H^+] + [CH_3OH_2^+] + [CH_3OH - CH_3OH_2^+] + [DME - H^+] \quad (S3b)$$

Concentrations of surface intermediates can be expressed as:

$$[CH_3OH_2^+] = K_M[CH_3OH][H^+] \quad (S3c)$$

$$[CH_3OH - CH_3OH_2^+] = K_D K_M [CH_3OH]^2 [H^+] \quad (S3d)$$

$$[DME - H^+] = K_1 [DME][H^+] \quad (S3e)$$

where  $K_M$ ,  $K_D$  and  $1/K_1$  are the equilibrium constants for the formation of methanol monomers, methanol dimers, and the desorption of DME.

The rate expression can be written as:

$$\frac{r_{DME}}{[H^+]} = \frac{k_{DME} K_M K_D [CH_3OH]^2}{1 + K_M [CH_3OH] + K_M K_D [CH_3OH]^2 + K_1 [DME]} \quad (S3f)$$

*S.4.4 Kinetically-relevant dehydration of methanol dimers in the associative scheme with water monomers and water dimers as inhibitory species.*

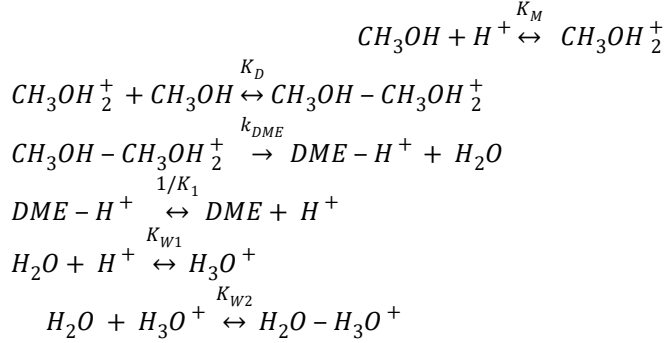

Assuming the decomposition of methanol dimers is rate determining, and all other steps are quasi-equilibrated, the rate expression can be written as:

$$\frac{r_{DME}}{[L]} = \frac{k_{DME} [CH_3OH - CH_3OH_2^+]}{[L]} \quad (S4a)$$

where  $k_{DME}$  is the rate constant for decomposition of the methanol dimer. The total number of active sites (L) can be expressed as following:

$$[L] = [H^+] + [CH_3OH_2^+] + [CH_3OH - CH_3OH_2^+] + [DME - H^+] + [H_3O^+] + [H_2O - H_3O^+] \quad (S4b)$$

Concentrations of surface intermediates can be expressed as:

$$[CH_3OH_2^+] = K_M [CH_3OH] [H^+] \quad (S4c)$$

$$[CH_3OH - CH_3OH_2^+] = K_D K_M [CH_3OH]^2 [H^+] \quad (S4d)$$

$$[DME - H^+] = K_1 [DME] [H^+] \quad (S4e)$$

$$[H_3O^+] = K_{W1} [H_2O] [H^+] \quad (S4f)$$

$$[H_2O - H_3O^+] = K_{W1} K_{W2} [H_2O]^2 [H^+] \quad (S4g)$$

where  $K_M$ ,  $K_D$ ,  $1/K_1$ ,  $K_{W1}$ , and  $K_{W2}$  are the equilibrium constants for the formation of methanol monomers, methanol dimers, the desorption of DME, the formation of water monomers, and the formation of water dimers.

The rate expression can be written as:

$$\frac{r_{DME}}{[H^+]} = \frac{k_{DME} K_M K_D [CH_3OH]^2}{1 + K_M [CH_3OH] + K_M K_D [CH_3OH]^2 + K_1 [DME] + K_{W1} [H_2O] + K_{W1} K_{W2} [H_2O]^2} \quad (S4f)$$

*S.4.5 Kinetically-relevant dehydration of methanol dimers with methanol monomers, methanol dimers and methanol-water dimers as MASIs.*

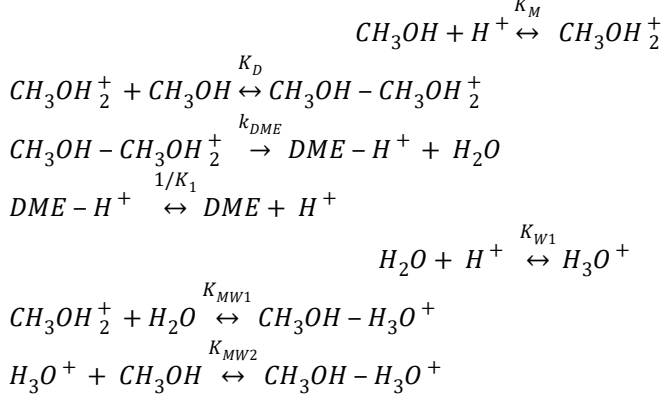

Assuming the decomposition of methanol dimers is rate determining, including water monomers and water-methanol dimers as possible inhibitory species, and assuming all other steps are quasi-equilibrated, the rate expression can be written as:

$$\frac{r_{DME}}{[L]} = \frac{k_{DME} [CH_3OH - CH_3OH_2^+]}{[L]} \quad (S5a)$$

where  $k_{DME}$  is the rate constant for the decomposition of a methanol dimer to DME.

$$[L] = [H^+] + [CH_3OH_2^+] + [CH_3OH - CH_3OH_2^+] + [DME - H^+] + [CH_3OH - H_3O^+] + \quad (S5b)$$

Concentrations of surface intermediates can be expressed as:

$$[CH_3OH_2^+] = K_M [CH_3OH] [H^+] \quad (S5c)$$

$$[CH_3OH - CH_3OH_2^+] = K_D K_M [CH_3OH]^2 [H^+] \quad (S5d)$$

$$[DME - H^+] = K_1 [DME] [H^+] \quad (S5e)$$

$$[H_3O^+] = K_{W1} [H_2O] [H^+] \quad (S5f)$$

$$[CH_3OH - H_3O^+] = (K_{MW2} K_{W1} + K_{MW1} K_M) [CH_3OH] [H_2O] [H^+] \quad (S5g)$$

The rate expression can be written as:

$$\frac{r_{DME}}{[H^+]} = \frac{k_{DME} K_M K_D [CH_3OH]^2}{1 + K_M [CH_3OH] + K_M K_D [CH_3OH]^2 + K_{W1} [H_2O] + K' [CH_3OH] [H_2O] + K_1 [DME]}$$

$$\text{where } K' = (K_{MW2} K_{W1} + K_{MW1} K_M) \quad (S5h)$$

Assuming that methanol monomers, methanol dimers, and water-methanol dimers are abundant intermediates, Eq. S5h can be simplified to:

$$\frac{r_{DME}}{[H^+]} = \frac{k_{DME} K_D K_M [CH_3OH]^2}{K_M [CH_3OH] + K_D K_M [CH_3OH]^2 + K' [CH_3OH] [H_2O]} \quad (S5i)$$

### S.5. Dependence of DME formation rate on DME and water partial pressure

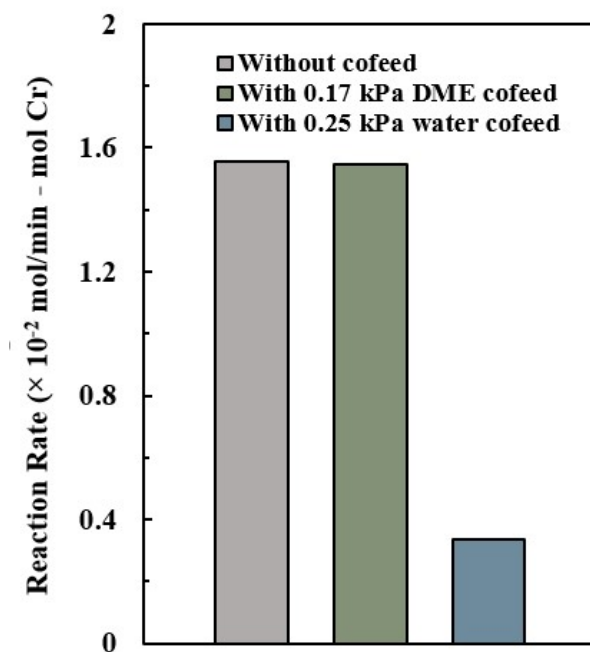

**Figure S3.** Reaction rates measured at 493 K with 1) 0.4 kPa methanol, 2) 0.4 kPa methanol and 0.17 kPa DME cofeed, and 3) 0.4 kPa methanol and 0.25 kPa water cofeed.  $7.3 - 7.6 \times 10^{-4}$  mol methanol  $(\text{mol Cr})^{-1} \text{s}^{-1}$ .

## S.6. Evolution of Brønsted acid site intensity after flowing 0.1 – 2 kPa methanol

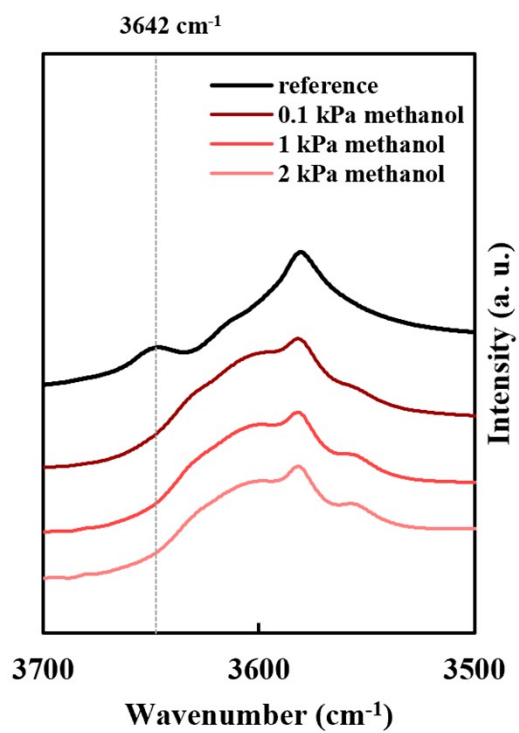

**Figure S4.** In-situ infrared spectra in the presence of 0.1 - 2 kPa methanol at 493 K compared to the reference spectrum collected prior to the introduction of methanol.

## S.7. Parity Plots

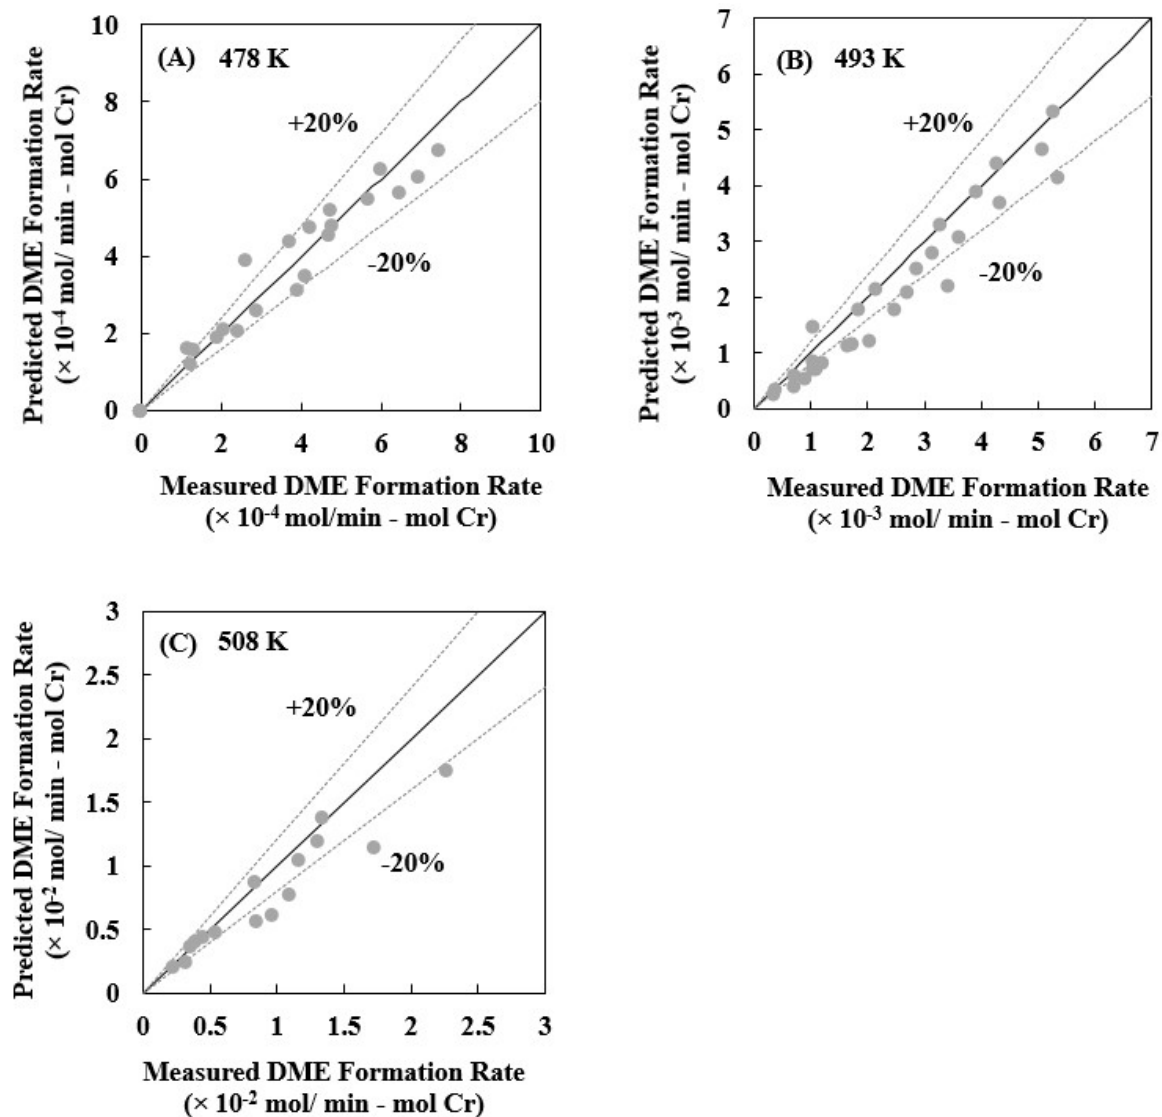

**Figure S5.** Parity plots comparing kinetic model predictions against measured DME formation rates at (A) 478 K, (B) 493 K, and (C) 508 K. Dashed lines represent  $\pm 20\%$  deviation.

### S.8. Dependence of DME formation rates on contact time

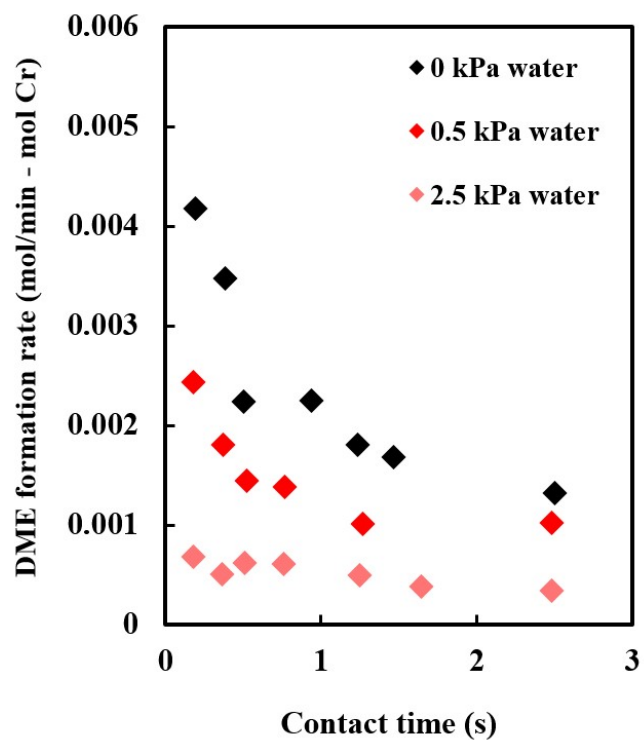

**Figure S6.** DME formation rates at 0.4 kPa methanol partial pressure and 0, 0.5, and 2.5 kPa water co-feed at 493 K.  $5.7 \times 10^{-3}$  -  $1.4 \times 10^{-1}$  mol methanol (mol Cr) $^{-1}$  s $^{-1}$ .



### S.9. Evolution of methanol monomer coverage after dosing 1 $\mu\text{L}$ methanol

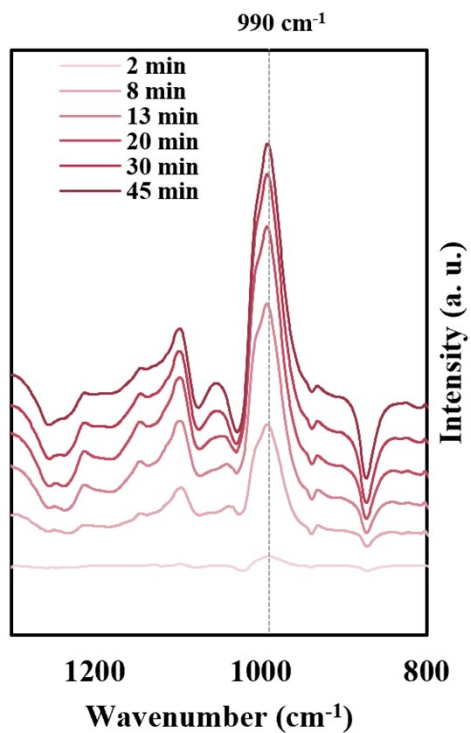

**Figure S7.** Accumulation of methanol monomers (C-O stretch of hydrogen-bonded methanol at 990  $\text{cm}^{-1}$ )<sup>7</sup> on the surface as a function of time.

## References

- 1 P. B. Weisz and J. S. Hicks, *Chem. Eng. Sci.*, 1995, **50**, 3951–3958.
- 2 D. E. Mears, *J. Catal.*, 1971, **20**, 127–131.
- 3 D. E. Mears, *Ind. Eng. Chem. Process Des. Dev.*, 2002, **10**, 541–547.
- 4 N. Wakao and T. Funazkri, *Chem. Eng. Sci.*, 1978, **33**, 1375–1384.
- 5 D. E. Mears, *Ind. Eng. Chem. Process Des. Dev.*, 2002, **10**, 541–547.
- 6 V. Balakotaiah, D. Kodra and D. Nguyen, *Chem. Eng. Sci.*, 1995, **50**, 1149–1171.
- 7 S. K. Matam, S. A. F. Nastase, A. J. Logsdail and C. R. A. Catlow, *Chem. Sci.* 2020, **11**, 6805-6814.
